# Supplementary material for: Synchrony in the periphery: inter-subject correlation of physiological responses during live music concerts
Source: PubMed Central journal article supplement (PMC8599424; doi:10.1038/s41598-021-00492-3), 2021-11-17
Supplement: 41598_2021_492_MOESM1_ESM.pdf [file 41598_2021_492_MOESM1_ESM.pdf]

# Synchrony in the periphery: inter-subject correlation of physiological responses during live music concerts

Anna Czepiel<sup>1\*</sup>, Lauren K. Fink<sup>1,2</sup>, Lea T. Fink<sup>1</sup>, Melanie Wald-Fuhrmann<sup>1,2</sup>, Martin Tröndle<sup>3</sup>, Julia Merrill<sup>1,4</sup>

<sup>1</sup> Max Planck Institute for Empirical Aesthetics, Frankfurt am Main, Germany

<sup>2</sup> Max Planck - NYU Center for Language, Music, & Emotion (CLaME), New York, USA

<sup>3</sup> Zeppelin University, Friedrichshafen, Germany

<sup>4</sup> Institute of Music, University of Kassel, Kassel, Germany

## Supplementary Information

**Supplementary Table S1a.** ANOVA for performance (acoustic) differences across concerts. ANOVA was calculated using Anova function in car package in R.

|                   | Beethoven |      |          | Brahms |          | Dean |          |
|-------------------|-----------|------|----------|--------|----------|------|----------|
|                   | df        | F    | <i>p</i> | F      | <i>p</i> | F    | <i>p</i> |
| RMS               | 2         | 2.14 | 0.12     | 0.23   | 0.79     | 0.12 | 0.89     |
| Spectral centroid | 2         | 1.78 | 0.17     | 1.54   | 0.21     | 2.82 | 0.06     |
| Tempo             | 2         | 2.56 | 0.08     | 0.02   | 0.98     | 2.31 | 0.10     |

**Supplementary Table S1b.** Lengths of separate movements of works.

|    | Beethoven movements |                 |                 |                 | Dean movements  |                 |                 |                 | Brahms movements |                 |                 |                 |
|----|---------------------|-----------------|-----------------|-----------------|-----------------|-----------------|-----------------|-----------------|------------------|-----------------|-----------------|-----------------|
|    | 1 <sup>st</sup>     | 2 <sup>nd</sup> | 3 <sup>rd</sup> | 4 <sup>th</sup> | 1 <sup>st</sup> | 2 <sup>nd</sup> | 3 <sup>rd</sup> | 4 <sup>th</sup> | 1 <sup>st</sup>  | 2 <sup>nd</sup> | 3 <sup>rd</sup> | 4 <sup>th</sup> |
| C1 | 7.80                | 8.15            | 3.76            | 6.37            | 2.53            | 3.87            | 3.90            | 3.39            | 10.17            | 7.15            | 5.37            | 4.94            |
| C2 | 7.95                | 8.36            | 3.74            | 6.50            | 2.70            | 3.87            | 3.93            | 3.49            | 10.24            | 7.07            | 5.39            | 4.95            |
| C3 | 7.75                | 8.02            | 3.71            | 6.23            | 2.68            | 3.87            | 3.79            | 3.14            | 10.03            | 6.97            | 5.46            | 4.93            |

**Supplementary Table S1c.** Correlations between features within movements. Bonferroni corrected  $p$  value was  $p = .0003$ . All correlations significance values we still under this threshold and, therefore, significant. Correlations were run using *corr.test* function from the *psych* package in R.

|      | RMS        |      |         | Spectral Centroid |       |         | Tempo      |      |         |
|------|------------|------|---------|-------------------|-------|---------|------------|------|---------|
|      | Comparison | $r$  | $p$     | Comparison        | $r$   | $p$     | Comparison | $r$  | $p$     |
| Bee1 | C1 - C2    | .947 | > .0001 | C1 - C2           | .8760 | > .0001 | C1 - C2    | .822 | > .0001 |
|      | C1 - C3    | .946 | > .0001 | C1 - C3           | .889  | > .0001 | C1 - C3    | .830 | > .0001 |
|      | C2 - C3    | .957 | > .0001 | C2 - C3           | .927  | > .0001 | C2 - C3    | .841 | > .0001 |
| Bee2 | C1 - C2    | .875 | > .0001 | C1 - C2           | .901  | > .0001 | C1 - C2    | .858 | > .0001 |
|      | C1 - C3    | .855 | > .0001 | C1 - C3           | .908  | > .0001 | C1 - C3    | .861 | > .0001 |
|      | C2 - C3    | .839 | > .0001 | C2 - C3           | .900  | > .0001 | C2 - C3    | .832 | > .0001 |
| Bee3 | C1 - C2    | .887 | > .0001 | C1 - C2           | .940  | > .0001 | C1 - C2    | .811 | > .0001 |
|      | C1 - C3    | .884 | > .0001 | C1 - C3           | .910  | > .0001 | C1 - C3    | .821 | > .0001 |
|      | C2 - C3    | .916 | > .0001 | C2 - C3           | .882  | > .0001 | C2 - C3    | .824 | > .0001 |
| Bee4 | C1 - C2    | .922 | > .0001 | C1 - C2           | .920  | > .0001 | C1 - C2    | .684 | > .0001 |
|      | C1 - C3    | .904 | > .0001 | C1 - C3           | .906  | > .0001 | C1 - C3    | .628 | > .0001 |
|      | C2 - C3    | .902 | > .0001 | C2 - C3           | .888  | > .0001 | C2 - C3    | .622 | > .0001 |
| Bra1 | C1 - C2    | .964 | > .0001 | C1 - C2           | .978  | > .0001 | C1 - C2    | .848 | > .0001 |
|      | C1 - C3    | .947 | > .0001 | C1 - C3           | .962  | > .0001 | C1 - C3    | .844 | > .0001 |
|      | C2 - C3    | .956 | > .0001 | C2 - C3           | .973  | > .0001 | C2 - C3    | .881 | > .0001 |
| Bra2 | C1 - C2    | .975 | > .0001 | C1 - C2           | .965  | > .0001 | C1 - C2    | .893 | > .0001 |
|      | C1 - C3    | .974 | > .0001 | C1 - C3           | .961  | > .0001 | C1 - C3    | .871 | > .0001 |
|      | C2 - C3    | .984 | > .0001 | C2 - C3           | .977  | > .0001 | C2 - C3    | .932 | > .0001 |
| Bra3 | C1 - C2    | .957 | > .0001 | C1 - C2           | .933  | > .0001 | C1 - C2    | .595 | > .0001 |
|      | C1 - C3    | .940 | > .0001 | C1 - C3           | .939  | > .0001 | C1 - C3    | .692 | > .0001 |
|      | C2 - C3    | .950 | > .0001 | C2 - C3           | .932  | > .0001 | C2 - C3    | .645 | > .0001 |
| Bra4 | C1 - C2    | .957 | > .0001 | C1 - C2           | .936  | > .0001 | C1 - C2    | .843 | > .0001 |
|      | C1 - C3    | .961 | > .0001 | C1 - C3           | .920  | > .0001 | C1 - C3    | .831 | > .0001 |
|      | C2 - C3    | .952 | > .0001 | C2 - C3           | .931  | > .0001 | C2 - C3    | .848 | > .0001 |
| Dea1 | C1 - C2    | .848 | > .0001 | C1 - C2           | .751  | > .0001 | C1 - C2    | .987 | > .0001 |
|      | C1 - C3    | .876 | > .0001 | C1 - C3           | .843  | > .0001 | C1 - C3    | .992 | > .0001 |
|      | C2 - C3    | .939 | > .0001 | C2 - C3           | .895  | > .0001 | C2 - C3    | .991 | > .0001 |
| Dea2 | C1 - C2    | .999 | > .0001 | C1 - C2           | .982  | > .0001 | C1 - C2    | 1    | > .0001 |
|      | C1 - C3    | .998 | > .0001 | C1 - C3           | .976  | > .0001 | C1 - C3    | 1    | > .0001 |
|      | C2 - C3    | .998 | > .0001 | C2 - C3           | .990  | > .0001 | C2 - C3    | 1    | > .0001 |
| Dea3 | C1 - C2    | .982 | > .0001 | C1 - C2           | .972  | > .0001 | C1 - C2    | .940 | > .0001 |
|      | C1 - C3    | .971 | > .0001 | C1 - C3           | .955  | > .0001 | C1 - C3    | .858 | > .0001 |
|      | C2 - C3    | .975 | > .0001 | C2 - C3           | .944  | > .0001 | C2 - C3    | .913 | > .0001 |
| Dea4 | C1 - C2    | .947 | > .0001 | C1 - C2           | .936  | > .0001 | C1 - C2    | .936 | > .0001 |
|      | C1 - C3    | .944 | > .0001 | C1 - C3           | .931  | > .0001 | C1 - C3    | .891 | > .0001 |
|      | C2 - C3    | .940 | > .0001 | C2 - C3           | .936  | > .0001 | C2 - C3    | .887 | > .0001 |

*Note.* Dean 2 was played via a recording, hence the perfect correlation for tempo across concerts (and near perfect for loudness and spectral centroid, with slight possible deviations in the audio recording).

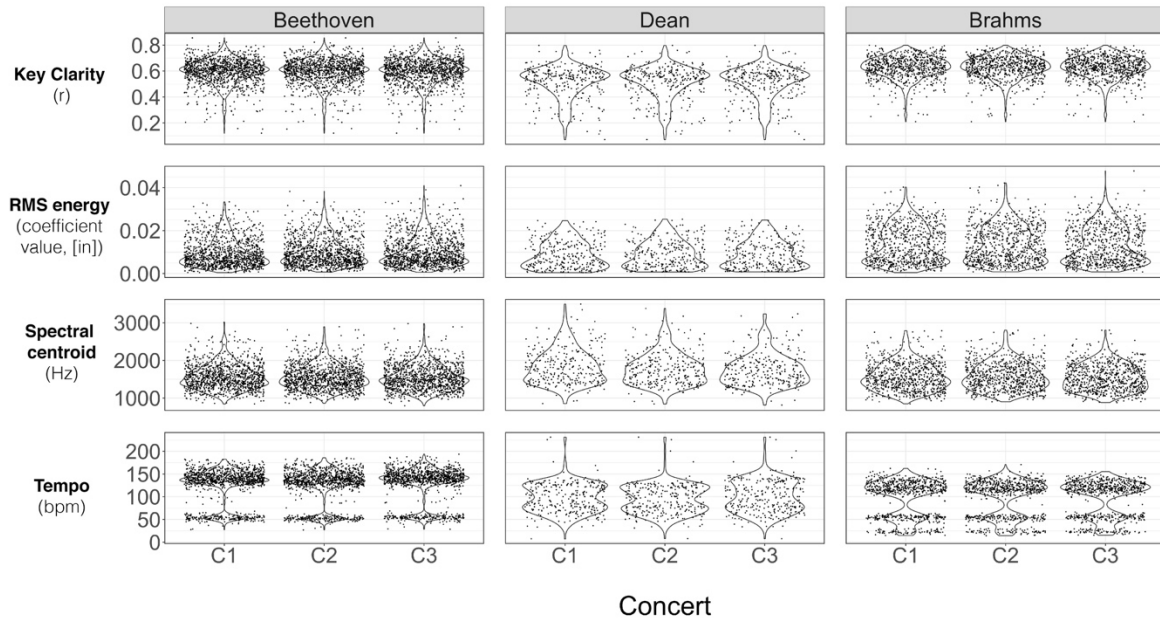

**Supplementary Figure S1.** Acoustic features per bar, per piece, per concert. Top to bottom panels show Key clarity, RMS energy, Spectral centroid, and tempo values per bar. Left panels show values for Ludwig van Beethoven (String Quintet in C minor, op. 104, 1817), middle panels for Brett Dean (Epitaphs, 2010), and right panels for Johannes Brahms (String Quintet in G major, op. 111, 1890). Separate violin plots show different concerts.

**Supplementary Table S2a.** Musical feature differences between styles. ANOVA was calculated using *Anova* function in *car* package in R. Values highlighted in bold are statistically significant.

| Acoustic feature  | df       | C1            |                  | C2            |                  | C3            |                  |
|-------------------|----------|---------------|------------------|---------------|------------------|---------------|------------------|
|                   |          | $\chi^2$      | <i>p</i>         | $\chi^2$      | <i>p</i>         | $\chi^2$      | <i>p</i>         |
| RMS               | <b>2</b> | <b>9.832</b>  | <b>.007</b>      | <b>9.853</b>  | <b>.007</b>      | <b>8.788</b>  | <b>.012</b>      |
| Spectral centroid | <b>2</b> | <b>21.630</b> | <b>&lt; .001</b> | <b>12.165</b> | <b>.002</b>      | <b>13.736</b> | <b>.001</b>      |
| Key clarity       | <b>2</b> | <b>28.738</b> | <b>&gt; .001</b> | <b>28.738</b> | <b>&gt; .001</b> | <b>28.738</b> | <b>&gt; .001</b> |
| Tempo             | 2        | 2.136         | .343             | 2.125         | .346             | 2.237         | .327             |

*Note.* As key clarity was the same across all concerts, there was no change in the difference between pieces between concerts.

**Supplementary Table S2b.** Pairwise comparisons of models comparing acoustic features between different pieces. Contrasts (Bonferroni adjusted) were calculated with *emmeans* package in R. Values highlighted in bold are statistically significant.

| Feature           | Concert               | Pairwise comparison   | Estimate        | SE           | df           | <i>t</i>      | <i>p</i>    |
|-------------------|-----------------------|-----------------------|-----------------|--------------|--------------|---------------|-------------|
| RMS               | C1                    | Beethoven-Brahms      | -0.004          | 0.002        | 8.46         | -2.423        | .120        |
|                   |                       | Beethoven-Dean        | 0.001           | 0.002        | 9.22         | 0.571         | 1.00        |
|                   |                       | <b>Brahms - Dean</b>  | <b>0.005</b>    | <b>0.002</b> | <b>9.42</b>  | <b>2.923</b>  | <b>.049</b> |
|                   | C2                    | Beethoven-Brahms      | -0.004          | 0.002        | 8.40         | -2.361        | .101        |
|                   |                       | Beethoven-Dean        | 0.001           | 0.002        | 9.25         | 0.676         | 1.00        |
|                   |                       | <b>Brahms - Dean</b>  | <b>0.005</b>    | <b>0.002</b> | <b>9.48</b>  | <b>2.959</b>  | <b>.045</b> |
|                   | C3                    | Beethoven-Brahms      | -0.003          | 0.002        | 8.40         | -2.090        | .205        |
|                   |                       | Beethoven-Dean        | 0.001           | 0.002        | 9.25         | 0.836         | 1.00        |
|                   |                       | <b>Brahms - Dean</b>  | <b>0.005</b>    | <b>0.002</b> | <b>9.48</b>  | <b>2.856</b>  | <b>.054</b> |
| Spectral centroid | C1                    | Beethoven-Brahms      | 0.54            | 76.6         | 8.39         | 0.007         | 1.00        |
|                   |                       | <b>Beethoven-Dean</b> | <b>-320.36</b>  | <b>78.7</b>  | <b>9.26</b>  | <b>-4.072</b> | <b>.008</b> |
|                   |                       | <b>Brahms - Dean</b>  | <b>-320.90</b>  | <b>79.2</b>  | <b>9.49</b>  | <b>-4.053</b> | <b>.008</b> |
|                   | C2                    | Beethoven-Brahms      | -12.2           | 87.3         | 8.54         | -0.139        | 1.00        |
|                   |                       | <b>Beethoven-Dean</b> | <b>-277.0</b>   | <b>89.0</b>  | <b>9.18</b>  | <b>-3.112</b> | <b>.037</b> |
|                   |                       | <b>Brahms - Dean</b>  | <b>-264.</b>    | <b>89.4</b>  | <b>9.35</b>  | <b>-2.962</b> | <b>.046</b> |
|                   | C3                    | Beethoven-Brahms      | -0.828          | 75.8         | 8.42         | -0.011        | 1.00        |
|                   |                       | <b>Beethoven-Dean</b> | <b>-252.462</b> | <b>77.7</b>  | <b>9.24</b>  | <b>-3.251</b> | <b>.029</b> |
|                   |                       | <b>Brahms - Dean</b>  | <b>-251.633</b> | <b>78.1</b>  | <b>9.45</b>  | <b>-3.221</b> | <b>.030</b> |
| Key clarity       | Beethoven-Brahms      | -0.031                | 0.021           | 8.40         | -1.495       | .541          |             |
|                   | <b>Beethoven-Dean</b> | <b>0.080</b>          | <b>0.021</b>    | <b>9.25</b>  | <b>3.791</b> | <b>.012</b>   |             |
|                   | <b>Brahms - Dean</b>  | <b>0.111</b>          | <b>0.021</b>    | <b>9.48</b>  | <b>5.216</b> | <b>.001</b>   |             |

*Note.* As key clarity was the same across all concerts, there was no change in the difference between pieces between concerts.

**Supplementary Table 3.** Familiarity ratings across concerts that were collected after each piece to the question if participants knew the piece (with three possible choices: yes, no, not sure).

|           | Familiar | Not sure if familiar | Unfamiliar |
|-----------|----------|----------------------|------------|
| Beethoven | 12.5%    | 28.4%                | 59.1%      |
| Brahms    | 15.9%    | 19.3%                | 65.9%      |
| Dean      | 0%       | 2.3%                 | 97.7%      |

Ludwig van Beethoven: Quintet op. 104, c minor. Music theoretical analysis of Mvt. 1, Allegro con brio, bars 1-137 (exposition)

**Supplementary Table S4a:** Complete movement, division of formal sections

| from bar | to bar | form part                       | length in bars |
|----------|--------|---------------------------------|----------------|
| 1        | 30     | Exposition - Primary zone       | 30             |
| 31       | 58     | Exposition - Transition         | 28             |
| 59       | 124    | Exposition - Secondary zone     | 66             |
| 124      | 137    | Exposition - Closing zone       | 14             |
| 138      | 213    | Development zone                | 76             |
| 214      | 223    | Recapitulation - Primary Zone   | 10             |
| 224      | 261    | Recapitulation - Transition     | 38             |
| 262      | 327    | Recapitulation - Secondary Zone | 66             |
| 328      | 360    | Recapitulation - Closing Zone   | 33             |

**Supplementary Table S4b:** Sample analysis of the exposition with broad function, harmonic context / development, phrase structure and dynamic relations

| from bar | to bar | event bar.beat | function                                                                      | phrase structure | harmonic context | dynamics (descriptive) |
|----------|--------|----------------|-------------------------------------------------------------------------------|------------------|------------------|------------------------|
| 1        | 30     |                | Exposition - Primary zone                                                     |                  | i = c minor      |                        |
| 1        | 10     |                | P <sup>0</sup>                                                                | 4+2+2+2          | c minor          | soft                   |
|          |        | 3-4            | basic idea: arpeggiated V (sixth chord)                                       |                  |                  |                        |
|          |        | 5-6            | b.i. repetition, on VI (sixth chord)                                          |                  | Ab major         |                        |
|          |        | 9.1            | delay, ornamented cadence                                                     |                  |                  | soft                   |
|          |        | 9.2            | ornament: highpoint of the melody, seventh                                    |                  |                  |                        |
|          |        | 9.3            | rhethoric delay                                                               |                  |                  |                        |
|          |        | 10.1           | HC, 9-8 suspension, fermata / delay                                           |                  | G major          | soft                   |
| 11       | 14     |                | P <sup>pres.1</sup> : compound basic idea                                     | 2+2              | c minor          | soft                   |
|          |        | 13-14          | HC, 4-3 suspension                                                            |                  |                  |                        |
| 15       | 18     |                | P <sup>pres.2</sup> : prolonging the tonic                                    | 2+2              |                  | soft                   |
|          |        | 17-18          | IAC, 4-3 suspension                                                           |                  |                  | soft                   |
| 19       | 30     |                | P <sup>cont.</sup> , pedal point on dominant, pendulum V-i (D-t), pre-cadence | 6+2+2+2          |                  | increasing             |
|          |        | 19.1           | start of pedal point                                                          |                  |                  | accent                 |
|          |        | 21             | increasing density, syncopations on 19.2, 20.2, 21.2 etc.                     |                  |                  | increasing             |
|          |        | 27.1           | dynamic maximum                                                               |                  |                  | strong                 |
|          |        | 27.3           | dynamic maximum                                                               |                  |                  | strong                 |
|          |        | 28.1           | dynamic maximum                                                               |                  |                  | strong                 |
|          |        | 29-30          | HC                                                                            |                  | G major          | strong                 |
| 31       | 58     |                | Exposition - Transition                                                       |                  | i --> III        |                        |
| 31       | 39     |                | TR-P <sup>0</sup> , transposed, shortened                                     | 4+2+2            | Ab major         | soft                   |
|          |        | 31.1           | harmonically surprising shift to VI (tG)                                      |                  |                  | strong                 |
|          |        | 33-34          | compare bars 3-4, motive: arpeggiated V (sixth chord)                         |                  |                  |                        |
|          |        | 35-36          | compare bars 5-6, motive repetition, on VI (sixth chord)                      |                  | Fb major         |                        |
|          |        | 37.1           | ante penultima - compare to bar 7                                             |                  |                  | strong                 |
|          |        | 38.1           | penultima, leadington in the bass                                             |                  |                  | strong                 |
| 37       | 39     |                | chromatic bassline progression to Bb, dominant of III (D)tP                   | 2+1              |                  | increasing             |
| 39       | 57     |                | "standing on the dominant", structural pedal point on Bb                      |                  | Bb major         |                        |
| 40       | 43     |                | TR-P <sup>1 ant</sup>                                                         | 2+2              | (V-i)            | increasing             |
| 44       | 47     |                | TR-P <sup>1 cons</sup>                                                        | 4+4              |                  | increasing             |
| 47       | 53     |                | TR-precadence, Takterstickung                                                 | 4+3              | (V-i)            | strong                 |
|          |        | 53.1           | MC declined                                                                   |                  |                  | strong                 |
| 53       | 56     |                | cadence, falling bassline                                                     | 4+2              |                  | decreasing             |
| 57       | 58     |                | Takterstickung, MC-fill                                                       |                  |                  |                        |
|          |        | 57.1           | MC deformed: HC V of III (tP)                                                 |                  | Bb major         |                        |
| 59       | 124    |                | Exposition - Secondary zone                                                   |                  | I = Eb major     |                        |
| 59       | 66     |                | S <sup>1.1</sup> , antecedent+consequent                                      | 4+4              | Eb major         | soft                   |
| 67       | 75     |                | S <sup>1.2</sup> , transposed repetition of S <sup>1</sup> , modulation to IV | 4+4+1            |                  | soft                   |
|          |        | 69.1           | beginning: new tonal region: IV                                               |                  | Ab major         | soft                   |
|          |        | 75.1           | IV: IAC                                                                       |                  |                  |                        |
|          |        | 75             | sustaining transitional bar                                                   |                  |                  |                        |
| 76       | 79     |                | S <sup>2 ant</sup>                                                            | 2+2              |                  | decreasing             |
|          |        | 79.1           | IV: HC                                                                        |                  |                  |                        |
| 80       | 91     |                | S <sup>2 con</sup> , pedalpoint on Eb, modulation to V dimin (1-->7th)        | 2+2+2+2+1+1+1+1  | eb - ab - Fdim.  | decreasing             |
|          |        | 91.1           | accent, syncopated phrase rhythm                                              |                  |                  | strong                 |
| 92       | 97     |                | pre-cadence V, harmonic rhythm accelerated                                    | 4+2              | Bb major         | strong                 |
|          |        | 96-97          | V: HC, 64-53 suspension                                                       |                  |                  |                        |
|          |        | 98.1           | I: evaded PAC, declined EEC                                                   |                  | Eb major         | strong                 |
| 98       | 109    |                | sequences of P <sup>0</sup> , pre-cadential                                   | 4+2+2+1+1+1+1    |                  | strong                 |
| 110      | 118    |                | S <sup>3.1</sup> , augmentation of ornamenting neighbournotes, IAC            | 4+4              |                  |                        |
|          |        | 111.1          | Neopolitan chord                                                              |                  | Fb major         |                        |
| 118      | 124    |                | S <sup>3.2</sup> , augmentation of ornamenting neighbournotes, IAC            | 3+3              |                  | arching                |
|          |        | 118.1          | Deceptive cadence                                                             |                  | Cb major         |                        |
| 124      | 137    |                | Exposition - Closing zone                                                     | 4+4              | I = Eb major     | increasing             |
|          |        | 124.1          | PAC, EEC                                                                      |                  | Eb major         | strong                 |
| 132      | 137    |                | cadence                                                                       | 2+2+2            |                  | strong                 |

**Supplementary Table S4c:** Terminology & References

|                      |                                                                                                                                                                                                                                                    |
|----------------------|----------------------------------------------------------------------------------------------------------------------------------------------------------------------------------------------------------------------------------------------------|
| Material:            | P, S, TR = Primary theme, Secondary theme, Transition (Hepokoski 2006)                                                                                                                                                                             |
| Temporal labels:     | P <sup>0, 1, etc.</sup> = Primary Theme and its consecutive sections (0 as introduction, 1 as first part of theme one, etc.),<br>e.g. TR-P <sup>0</sup> = section of transition with material that originates in the primary zone (Hepokoski 2006) |
| Phrase structure:    | ant. / cons. / pres. / cont. = antecedent / consequent / presentation / continuation. (Caplin 1998)                                                                                                                                                |
| Cadences:            | HC = half cadence, IAC = imperfect authentic cadence, PAC = perfect authentic cadence, DC = deceptive cadence                                                                                                                                      |
| Functional cadences: | EEC = essential expositional closure, ESC = essential structural closure, MC = medial caesura (Hepokoski 2006)                                                                                                                                     |

Caplin, W. E. (1998). *Classical Form: A Theory of Formal Functions for the Instrumental Music of Haydn, Mozart, and Beethoven*. New York: Oxford University Press

Hepokoski, J. A., & Darcy, W. (2006). *Elements of sonata theory: Norms, Types, and Deformations in the Late Eighteenth-Century Sonata*. New York: Oxford University Press.

**Supplementary Table S5a.** Musical descriptions of bars with salient physiological responses: Beethoven

| Ludwig van Beethoven: String Quintet in C minor op. 104 (1817) |                               |                                                                                                   |                                                                                                                                                   |
|----------------------------------------------------------------|-------------------------------|---------------------------------------------------------------------------------------------------|---------------------------------------------------------------------------------------------------------------------------------------------------|
| Movement                                                       | Bars                          | Categories                                                                                        | Description                                                                                                                                       |
| 1 <sup>st</sup> *                                              | 24-30                         | Phrase repetition<br>Transition                                                                   | Exposition: Increasing texture, dynamics & harmonic rhythm, modulation and half-cadence bar30 ending the primary-theme zone (P)                   |
|                                                                | 35-37                         | Phrase repetition                                                                                 | Exposition: Chromatic sequence at opening of transition (T)                                                                                       |
|                                                                | 85-88                         | Phrase repetition<br>Transition                                                                   | Exposition: Decreasing texture & dynamics, bar-wise repetition of motif, elongation & prolongation of secondary diminished dominant               |
|                                                                | 96-97                         | Boundary                                                                                          | Exposition: Strong half-cadence, essential expositional closure (EEC) declined in b97                                                             |
|                                                                | 136-138                       | Phrase repetition<br>Boundary                                                                     | Exposition: Increasing texture & dynamics, syncopations, cadence ending the closing zone (C) of exposition. First chord of development section.   |
|                                                                | 287-290                       | Phrase repetition<br>Transition                                                                   | Recapitulation: Decreasing texture & dynamics, bar-wise repetition of motif, prolongation of secondary diminished dominant                        |
|                                                                | 291-293                       | Phrase repetition                                                                                 | Recapitulation: Elongation & prolongation of secondary diminished dominant                                                                        |
|                                                                | 301-302                       | Boundary                                                                                          | Recapitulation: essential structural closure (ESC) declined in b300, beginning of strong transitional section, motivic development of P in unison |
|                                                                | 303-307                       | Transition                                                                                        | Recapitulation: strong transitional section, motivic development of P in unison                                                                   |
|                                                                | 328-331                       | Boundary                                                                                          | Coda: Reference to opening bars with fermata & tempo change (150bpm to Adagio, ca. 80 bpm and back) after final cadence in b327                   |
| 2 <sup>nd</sup>                                                | 62-64                         | Boundary                                                                                          | Variation 1: Perfect authentic cadence (PAC), end of var 1                                                                                        |
|                                                                | 126-130                       | Transition                                                                                        | Variation 3: increase of dynamic ( <i>morendo</i> ), PAC b129 ending var. 3 in minor.                                                             |
|                                                                |                               | Boundary                                                                                          | Variation 4: Key, texture, tempo change, beginning of var.4 in major                                                                              |
| 3 <sup>rd</sup>                                                | 65-67**                       | Phrase repetition                                                                                 | Menuetto 1, B-part 2 <sup>nd</sup> time: standing on the dominant after half cadence (HC) b64, reference to beginning of B-part b55-58            |
|                                                                | 84-88                         | Boundary                                                                                          | Menuetto 1, A'-part 2 <sup>nd</sup> time: end of menuetto (minor), beginning of Trio (major). Change of key, register, texture, phrase rhythm     |
| 4 <sup>th</sup> *                                              | 10-14                         | Boundary<br>Transition                                                                            | Exposition: beginning of primary theme one (P1) after intro & general rest in b8                                                                  |
|                                                                | 150-153                       | Phrase repetition                                                                                 | Development: continuation within P0 at the beginning of development,                                                                              |
|                                                                |                               | Boundary                                                                                          | half cadence, general rest                                                                                                                        |
| 187-188                                                        | Phrase repetition<br>Boundary | Development: rotation of subordinate theme (S), second pair of of six-bar chromatic sequence of S |                                                                                                                                                   |

\*Note: no repeat. \*\*Note: Bars in relation to repeats

**Supplementary Table S5b.** Musical descriptions of bars with salient physiological responses: Dean

| Brett Dean: Epitaphs (2010) |            |                                                                                                                           |                                                                        |
|-----------------------------|------------|---------------------------------------------------------------------------------------------------------------------------|------------------------------------------------------------------------|
| Movement                    | Bars       | Categories                                                                                                                | Description                                                            |
| 2 <sup>nd</sup>             | 23-25      | Transition                                                                                                                | Increasing texture density, rhythmically clearer than previous context |
|                             | 61-62      | Transition                                                                                                                | Closing phrase with decreasing loudness                                |
|                             |            | Boundary                                                                                                                  | cadence and <i>finalis</i> with fermata                                |
| 70-71                       | Transition | Increasing loudness and dissonance, varied repetition, change of pitch class quality & timbre ( <i>increasingly raw</i> ) |                                                                        |
| 4 <sup>th</sup>             | 75-77      | Boundary                                                                                                                  | Sudden decrease of dynamics, change of texture & timbre                |
|                             |            | Transition                                                                                                                | Glissando over 3+3+2 pattern                                           |

**Supplementary Table S5c.** Musical descriptions of bars with salient physiological responses: Brahms

| Johannes Brahms: String Quintet in G major op. 111 (1890) |           |                   |                                                                                                                                                                                                    |
|-----------------------------------------------------------|-----------|-------------------|----------------------------------------------------------------------------------------------------------------------------------------------------------------------------------------------------|
| Movement                                                  | Bars      | Categories        | Description                                                                                                                                                                                        |
| 1 <sup>st</sup> *                                         | 90-91     | Phrase repetition | Development: combined P/S space, homophonic texture                                                                                                                                                |
| 3 <sup>rd</sup>                                           | 6-8       | Transition        | 1 <sup>st</sup> minor part, A: modulation to half cadence in the middle of 8-bar continuation. Small increase of dynamics, descending line in upper melody                                         |
|                                                           | 58-61**   | Boundary          | 1 <sup>st</sup> minor part, B: end of first, beginning of second repeat. Final cadence with <i>finalis</i> b58 lowest pitch of the melody, change to major b59, change of register and texture b61 |
|                                                           | 170-171** | Boundary          | 2 <sup>nd</sup> minor part, A: end of 12-bar antecedent on HC, beginning of consequent (repeat of antecedent), change of register to upper octave                                                  |
| 4 <sup>th</sup>                                           | 218-219   | Boundary          | 2 <sup>nd</sup> major part, coda: end of 2 <sup>nd</sup> minor part, beginning of coda, change of key                                                                                              |
|                                                           | 75-76     | Transition        | Exposition: within coda, change of texture & timbre, decrease of dynamics, modal cadence with 5-6 progression                                                                                      |
|                                                           | 248-250   | Boundary          | Coda: beginning of <i>stretta</i> (120 bpm to 140 bpm), homophonic, clear rhythm                                                                                                                   |

\*Note: no repeat. \*\*Note: Bars in relation to repeats
